1

## 2 **Modeling enamel matrix secretion in mammalian teeth**

3

4 Teemu J. Häkkinen<sup>1,2,\*</sup>, S. Susanna Sova<sup>1,3</sup>, Ian J. Corfe<sup>1</sup>, Leo Tjäderhane<sup>4</sup>, Antti Hannukainen<sup>2</sup>  
5 & Jukka Jernvall<sup>1,\*</sup>

6

7 <sup>1</sup>Developmental Biology Program, Institute of Biotechnology, University of Helsinki, P.O. Box  
8 56, FI-00014 Helsinki, Finland.

9 <sup>2</sup>Department of Mathematics and Systems Analysis, Aalto University, P.O. Box 11100, FI-  
10 00076 Aalto, Finland.

11 <sup>3</sup>Department of Geosciences and Geography, University of Helsinki, P.O. Box 64, FI-00014  
12 Helsinki, Finland.

13 <sup>4</sup>Department of Oral and Maxillofacial Diseases, Helsinki University Hospital, University of  
14 Helsinki, P.O. Box 41, FI-00014, Helsinki, Finland.

15 \*To whom correspondence should be addressed: Email: [hakkinen@fastmail.com](mailto:hakkinen@fastmail.com) or  
16 [jernvall@fastmail.fm](mailto:jernvall@fastmail.fm)

17 Author Contributions: T.J.H., S.S.S. and J.J. conceived the study, T.J.H. constructed the model,  
18 A. H. suggested the velocity extension scheme and provided input on the algorithms, S.S.S.,  
19 I.J.C. and L.T. collected and processed the empirical data, T.J.H., S.S.S. and J.J. performed the  
20 simulations, analyzed the results and wrote the paper. All authors discussed the results and  
21 provided input and scientific interpretations on the manuscript.

22 **Abstract**

23 The most mineralized tissue of the mammalian body is tooth enamel. Especially in species with  
24 thick enamel, three-dimensional (3D) tomography data has shown that the distribution of  
25 enamel varies across the occlusal surface of the tooth crown. Differences in enamel thickness  
26 among species and within the tooth crown have been used to examine taxonomic affiliations,  
27 life history, and functional properties of teeth. Before becoming fully mineralized, enamel  
28 matrix is secreted on the top of a dentine template, and it remains to be explored how matrix  
29 thickness is spatially regulated. To provide a predictive framework to examine enamel  
30 distribution, we introduce a computational model of enamel matrix secretion that maps the  
31 dentine topography to the enamel surface topography. Starting from empirical enamel-dentine  
32 junctions, enamel matrix deposition is modeled as a diffusion-limited free boundary problem.  
33 Using laboratory microCT and synchrotron tomographic data of pig molars that have markedly  
34 different dentine and enamel surface topographies, we show how diffusion-limited matrix  
35 deposition accounts for both the process of matrix secretion and the final enamel distribution.  
36 Simulations reveal how concave and convex dentine features have distinct effects on enamel  
37 surface, thereby explaining why the enamel surface is not a straightforward extrapolation of the  
38 dentine template. Human molar simulations show that even subtle variation in dentine  
39 topography can be mapped to the enamel surface features. Mechanistic models of extracellular  
40 matrix deposition can be used to predict occlusal morphologies of teeth.

41

42 **Introduction**

43 Most mammalian species have their teeth covered by a layer of highly mineralized enamel. The  
44 thickness of the enamel layer relative to the tooth size ranges from thin to very thick. These  
45 differences among species, and also increasingly within the tooth crown, have been informative  
46 in studies focused on functional properties of teeth, taxonomy, and life history (1-9). Even  
47 though mutations in genes required for enamel matrix secretion and maturation are known to  
48 affect the enamel thickness in mammals (10), relatively little is known about the regulatory  
49 changes that might underlie the variation in enamel thickness among populations or species

50 (1,11,12). Even less is known about the regulation of enamel thickness variation within the  
51 tooth crown, which contrasts with the increasing availability of 3D tomography data on various  
52 species. Analyses of such tomography data show that even though the enamel surface  
53 topography reflects the enamel-dentine junction (EDJ) topography, the enamel surface is not a  
54 simple extrapolation of the EDJ shape (13-15). Because enamel distribution is not  
55 developmentally remodeled after formation, and because the internal structure of mineralized  
56 enamel retains developmental information, tomography data of fully formed teeth can be used to  
57 examine mechanisms underlying variation in enamel thickness. To provide mechanistic insights  
58 into the regulation of enamel thickness, here we combine tomography data on enamel  
59 distribution with a computational approach and introduce a model to simulate enamel matrix  
60 secretion.

61

## 62 **Results**

63 **The Model Principles and Simulation of Artificial Shapes.** The enamel matrix is secreted by  
64 specialized epithelial cells, the ameloblasts, which depart from the EDJ. The EDJ is defined by  
65 the mesenchymal dentine matrix, whose secretion begins first (Fig. 1A). For empirical tests, we  
66 used EDJs of real teeth as the starting point to simulate matrix secretion (Fig. 1A). Matrix  
67 deposition is modeled as a diffusion-limited free boundary problem, motivated by the classical  
68 Stefan problem that models phase transition of undercooled liquid by assuming that the rate of  
69 phase transition from liquid to solid is limited by a diffusion process (see Methods and  
70 Supplementary Information) (16,17). Here we similarly assume that the growth of the matrix  
71 front is a diffusion-limited process: The advancement of the ameloblast layer departing from the  
72 EDJ is assumed to be limited by the diffusion of nutrition, by which we refer communally to all  
73 the factors that ameloblasts require for the secretion of the matrix (Fig. 1B). The model

74 parameters adjust the nutrition diffusion rate, the amount of nutrition required for growth, and  
75 the interfacial tension or stiffness of the advancing ameloblast layer (Methods). Model  
76 equations are solved using the finite element method, and the matrix interface (the ameloblast  
77 layer) is tracked using the level set method (Supplementary Information). The source code of  
78 the Matlab implementation of the model is freely available (Methods). For computational  
79 efficiency, the model is implemented in 2D and 3D reconstructions are obtained by simulating  
80 multiple sections that are combined into volumes.

81 The fundamental component of the model is the assumption that the growth of the matrix  
82 requires a net influx of a diffusing nutrient substance. At the initial stage nutrition is assumed to  
83 be present exterior to the dentine, and the nutrient is also replenished by a constant background  
84 source (Methods). By controlling the relative amount of background production, we examine  
85 two hypothetical matrix secretion processes. The primary process tested is a diffusion-limited  
86 secretion in which concave surfaces are progressively exaggerated as the features protruding  
87 into the nutrition-rich domain receive more nutrition than the concavities (Fig. 1C). An  
88 alternative process assumes excess availability of nutrition through strong background  
89 production, leading to a moving boundary of uniform thickness (Fig. 1D). This latter process in  
90 fact closely approximates a simple geometric extrapolation of matrix thickness from the EDJ,  
91 which we use as a null hypothesis to demonstrate the non-linearity of the matrix deposition.  
92 Simulations of matrix secretion using a synthetic EDJ shape show that whereas convex EDJ  
93 surfaces result in relatively linear extrapolation of the enamel surface in both simulations (Fig.  
94 1C, D), concave surfaces of diffusion-limited simulations behave nonlinearly (Fig. 1C).  
95 Additionally, reducing interfacial tension in the simulations increases small undulations in the  
96 moving front (Fig. 1E), suggesting that lowered stiffness of the ameloblast layer may underlie  
97 crenulated enamel found in taxa such as *Chiropotes* (saki monkeys) with relatively smooth EDJ  
98 (14).

99 **Diffusion-Limited Simulations Predict Enamel Distribution on Pig Molar Teeth.** To  
100 simulate enamel matrix secretion in real teeth, first we focused on domestic pig molar teeth that  
101 exhibit substantial variation in enamel thickness and EDJ topography (Figs 1A, 2A, ref. 18).  
102 EDJ and enamel surface shapes were reconstructed from microCT scans of first lower molars  
103 (Fig. 2A, Methods). From the data, horizontal slices of cusps were extracted (Fig. 2A) and the  
104 EDJs were used as the starting point for the simulations. The horizontal plane represents a  
105 relatively synchronous front of enamel matrix secretion and captures the complex EDJ  
106 morphology of the pig molars (18). The simulations show that the diffusion-limited process  
107 reproduces the deep narrow furrows or fissures present on the concave sides of the real cusps  
108 (Fig. 2A, B). In contrast, these features are lost when the enamel matrix is geometrically  
109 extrapolated from the EDJ, or when modeling with excess background nutrition (Fig. 2C).  
110 These results support the role of a diffusion-limited-like process in the regulation of enamel  
111 matrix secretion, and underscore the distinct effects that the convex and concave EDJ features  
112 impose on the enamel distribution. Indeed, whereas cusps of individual pigs vary in their  
113 detailed cusp morphology, the overall distribution of convex and concave features is conserved  
114 (Fig. S1).

115       Next we simulated the matrix secretion in a whole cusp with both convex and concave  
116 features (Methods). A 3D reconstruction of these simulations show that the diffusion-limited  
117 model captures the overall enamel thickness patterns in which concavities show reduced enamel  
118 thickness whereas ridges show increased enamel thickness (Fig. 3, Fig. S2). A small ridge  
119 present in the middle of a dentine concavity results in a local thickening of the enamel within an  
120 otherwise deep fissure (arrow heads in Fig. 3A-C), a feature completely lost in geometrically  
121 extrapolated surfaces (Fig. 3D).

122

123 **Diffusion-Limited Simulations Reproduce the Progression of Matrix Secretion.** In addition  
124 to the distribution of enamel in fully formed tooth, the diffusion-limited simulations can be used  
125 to examine the progression of the matrix secretion process itself. The successive positions of the  
126 matrix-secreting front during development is recorded in teeth by incremental lines (laminations  
127 or striae of Retzius, ref. 9) that are broadly analogous to growth rings in trees (19). These are  
128 preserved in mature enamel and can be observed from thin sections or through phase contrast  
129 synchrotron imaging (19,20). We obtained synchrotron data from a pig molar and compared the  
130 positions of individual incremental lines in convex cusp ridges with the lines in cusp concavities  
131 (Fig. 4A). Both the virtual incremental lines of diffusion-limited simulations and empirical  
132 incremental lines show initially relatively uniform distances from the EDJ, but this uniformity  
133 disappears and the differences between ridges and valleys become progressively larger as the  
134 secretion accelerates in the ridges and slows down in the valleys (Fig. 4). These results are  
135 suggestive that in addition to the final patterns of enamel distribution, the diffusion-limited  
136 model captures aspects of the actual secretion process.

137

138 **Subtle EDJ Concavities Are Sufficient to Produce Complex Enamel Surface Features.** Pigs  
139 are an example of species with relatively pointed molar cusps, allowing the simulation of matrix  
140 secretion in the horizontal plane. In contrast, molars of primates with thick enamel, including  
141 humans, typically have relatively low cusp relief. Therefore, to capture matrix secretion of  
142 human molar morphology, we run the diffusion-limited simulations vertically. Because the  
143 enamel becomes globally thinner towards the tooth neck, or lower portion of the tooth crown,  
144 we implemented a nutrient sink at the base (Methods). The sink decreases the rate of matrix  
145 formation towards the base of the crown, thereby approximating crown formation and the apical  
146 decline in matrix secretion before the initiation of root development (ref. 9, Fig. 5A). The

147 simulations show the subtle waviness of the human EDJ, with manly concave ripple-like  
148 features, is enough to produce the characteristic undulations of the enamel surface (Fig. 5B,C).  
149 These features are further refined by simulations using lateral braces mimicking the presence of  
150 adjacent teeth and alveolar bone (Fig. 5B), in agreement with the suggested role of the  
151 surrounding tissues in the regulation of tooth shape and mineralization (21,22). Taken together,  
152 these simulations indicate that even subtle EDJ features present in many hominids are important  
153 for the functional surface morphology of the tooth.

154

## 155 **Conclusions**

156 Our diffusion-limited model suggests an objective basis for mapping the EDJ morphology to  
157 enamel surface morphology. The simulations point to the critical role of convex and concave  
158 EDJ surface features in the regulation of final tooth surface morphology. These results also  
159 indicate that complex patterns of enamel thickness on a tooth crown can result from a single  
160 developmental process, without the need to evoke specific control or explanations for individual  
161 thickness features. Combined with in-depth analyses of enamel formation rates (4, 9, 18) and  
162 isotope compositions (23, 24) obtainable from sections, our model should help to move studies  
163 using enamel thickness towards more mechanistic and predictive science. This approach should  
164 also be applicable to other systems with extracellular matrix secretion, or organs in which  
165 directional tissue growth may be diffusion limited. Diffusion-limited free boundary problems  
166 have a long history in mathematics (16, 17, 25), and as shown here, they can contribute to  
167 solving biological problems.

168

169

170 **Materials and Methods**

171 **Diffusion-limited model.** We solve the model using a finite element method algorithm  
172 presented in ref. 26. For implementation details and source code, see Supplementary  
173 Information and <https://github.com/tjhakkin/biomatrix>.

174 **Dental data and processing.** Molars were extracted, stored and microCT imaged using the  
175 protocols, and pig and human molar samples described in ref. 18. The voxel resolutions were 10  
176 to 24  $\mu\text{m}$  (pig molars) and 17  $\mu\text{m}$  (human molars), and downsampled to 44  $\mu\text{m}$  (pig molars) and  
177 66  $\mu\text{m}$  (human molars). Synchrotron data was collected at beamline ID19 of the European  
178 Synchrotron Radiation Facility, with voxel resolution 2.24  $\mu\text{m}$ , keV = 91, and 6000 projections  
179 in 4x accumulation mode. Synchrotron data reconstruction used Paganin style single  
180 propagation distance phase contrast. All the image processing steps after primary tomography  
181 reconstructions were carried out with Fiji 2.0 (27). To digitize EDJs for simulations, EDJs in  
182 each individual section were traced with a freehand selection, and the area was converted to a  
183 line (Edit/Selection/Area to Line). The line was then interpolated with an interval of 10 pixels  
184 (Edit/Selection/Interpolate), fitted to a spline (Edit/Selection/Fit spline), and adjusted manually  
185 to follow the EDJ if needed. The splines were saved in ROI Manager (Analyze/Tools/ROI  
186 manager/more/save). The splines were saved as XY coordinates (File/Save As/XY Coordinates)  
187 that were converted to level sets using a Python script, included with the source code. During  
188 the conversion the spatial node density and the relative size of the EDJ within the domain were  
189 also defined. To scale different sized EDJs uniformly (e.g., when EDJs become smaller towards  
190 the cusp tip), two small triangles placed in diagonally opposing corners were included in each  
191 level set conversion. To enhance the visualization of the incremental lines in synchrotron  
192 reconstructions, three adjacent slices were averaged.

193 **Simulations and analyses.** The main simulation parameters are listed in Table S1. Simulation  
194 output for each step is an image file. The pig trigonids and talonids were simulated separately



195 (Fig. 2B). To compensate for the isolated entoconid cusp being larger (Fig. 3) than when part of  
196 the talonid (Fig. 2), interfacial tension and number of iterations were decreased in the individual  
197 cusp simulations. For simulations of multiple sections (Figs 3, 5C), all the sections of the  
198 analyzed step were merged into a stack in Fiji. For the pig molar cusp (Fig. 3), every second  
199 microCT slice (20  $\mu\text{m}$  interval, 51 slices), and for the human molar (Fig. 5C), every fifth slice  
200 (66  $\mu\text{m}$  interval, 27 slices) was simulated. We used the basal sink to approximate developmental  
201 progression in the vertical simulations. Because intercuspal regions lack the sink, vertical  
202 simulations slightly exaggerate enamel thickness in valleys relative to cusp tips. Geometric  
203 extrapolation of enamel thickness was obtained in Fiji by fitting a fixed sized circle along the  
204 EDJ (Process/Morphology/Gray Morphology/Dilate). To visualize enamel thickness in 3D, the  
205 EDJ and enamel surfaces were exported from Fiji (surfaces exported as Wavefront .obj from 3D  
206 Viewer plugin) and imported into Meshlab (<http://meshlab.sourceforge.net/>). In Meshlab,  
207 Hausdorff distance was used to compare distances between two surfaces (28). The distances  
208 were calculated after smoothing the meshes with Laplacian smooth (3 steps). All 3D  
209 visualizations use orthographic projections.

210

## 211 **Acknowledgements**

212 We thank H. Suhonen for help with microCT imaging, and J. Laakkonen for help with material.  
213 We acknowledge the European Synchrotron Radiation Facility for provision of synchrotron  
214 radiation facilities and thank P. Tafforeau for assistance in using beamline ID19. We thank M.  
215 Fortelius and the members of the Center of Excellence in Experimental and Computational  
216 Developmental Biology Research for discussions or advise. Financial support was provided by  
217 the Academy of Finland and Vilho, Yrjö and Kalle Väisälä Foundation.

218

219

## 220 **References**

- 221 1. Schwartz GT (2000) Taxonomic and functional aspects of the patterning of enamel  
222 thickness distribution in extant large-bodied hominoids. *Am J Phys Anthropol* 111:221–244.
- 223 2. Grine FE (2005) Enamel Thickness of Deciduous and Permanent Molars in Modern *Homo*  
224 *sapiens*. *Am J Phys Anthropol* 126:14–31.
- 225 3. Smith TM, Olejniczak AJ, Martin LB, Reid DJ (2005) Variation in hominoid molar enamel  
226 thickness. *J Hum Evol* 48:575–592.
- 227 4. Dean MC (2006) Tooth microstructure tracks the pace of human life-history evolution.  
228 *Proc R Soc B* 273:2799–2808.
- 229 5. Lucas P, Constantino P, Wood B, Lawn B (2008) Dental enamel as a dietary indicator in  
230 mammals. *BioEssays* 30:374–385.
- 231 6. Olejniczak AJ, Smith TM, Skinner MM, Grine FE, Feeney RNM, Thackeray JF, Hublin J-J  
232 (2008) Three-dimensional molar enamel distribution and thickness in *Australopithecus* and  
233 *Paranthropus*. *Biol Lett* 4:406–410.
- 234 7. Skinner MM, Alemseged Z, Gaunitz C, Hublin J-J (2015) Enamel thickness trends in Plio-  
235 Pleistocene hominin mandibular molars. *J Hum Evol* 85:35–45.
- 236 8. Pan L, Dumoncel J, de Beer F, Hoffman J, Thackeray JF, Duployer B, Tenailleau C, Braga  
237 J (2016) Further morphological evidence on South African earliest *Homo* lower postcanine  
238 dentition: Enamel thickness and enamel dentine junction. *J Hum Evol* 96:82–96.
- 239 9. Kierdorf H, Breuer F, Witzel C, Kierdorf U (2018) Pig enamel revisited – Incremental  
240 markings in enamel of wild boars and domestic pigs. *J Struc Biol*. doi:  
241 10.1016/j.jsb.2018.11.009.
- 242 10. Wright JT, Hart TC, Hart PS, Simmons D, Suggs C, Daley B, Simmer J, Hu J, Bartlett JD,  
243 Li Y, Yuan Z A, Seow WK, Gibson CW (2009) Human and mouse enamel phenotypes  
244 resulting from mutation or altered expression of AMEL, ENAM, MMP20 and KLK4. *Cells*  
245 *Tissues Organs* 189:224–229.
- 246 11. Horvath JE, Ramachandran GL, Fedrigo O, Nielsen WJ, Babbitt CC, St. Clair EM,  
247 Pfefferle LW, Jernvall J, Wray GA, Wall CE (2014) Genetic comparisons yield insight into

- 248 the evolution of enamel thickness during human evolution. *J Hum Evol* 73:75–87.
- 249 12. Daubert DM, Kelley JL, Udod YG, Habor C, Kleist CG, Furman IK, Tikonov IN, Swanson  
250 WJ, Roberts FA (2016) Human enamel thickness and ENAM polymorphism. *Int J Oral Sci*  
251 8:93–97.
- 252 13. Skinner MM, Wood BA, Hublin J-J (2009) Protostylid expression at the enamel-dentine  
253 junction and enamel surface of mandibular molars of *Paranthropus robustus* and  
254 *Australopithecus africanus*. *J Hum Evol* 56:76–85.
- 255 14. Skinner MM, Evans A, Smith T, Jernvall J, Tafforeau P, Kupczik K, Olejniczak AJ, Rosas  
256 A, Radovic J, Thakeray JF, Toussaint M, Hublin J-J (2010) Contributions of enamel-  
257 dentine junction shape and enamel deposition to primate molar crown complexity. *Am J*  
258 *Phys Anthropol* 142:157–163.
- 259 15. Guy F, Lazzari V, Gilissen E, Thiery G (2015) To what extent is primate second molar  
260 enamel occlusal morphology shaped by the enamel-dentine junction? *PLoS ONE*  
261 10:e0138802. doi:10.1371/journal.pone.0138802.
- 262 16. Chen S, Merriman B, Osher S, Smereka PA (1997) A simple level set method for solving  
263 Stefan problems. *J Comp Physics* 135:8–29.
- 264 17. Chen H, Min C, Gibou F (2009) A numerical scheme for the Stefan problem on adaptive  
265 Cartesian grids with supralinear convergence rate. *J Com. Physics* 228:5803–5818.
- 266 18. Sova SS, Tjäderhane L, Heikkilä PA, Jernvall J (2018) A microCT study of three-  
267 dimensional patterns of biomineralization in pig molars. *Front Physiol* 9:71 doi:  
268 10.3389/fphys.2018.00071.
- 269 19. Beynon AD, Dean MC, Reid DJ (1991) On thick and thin enamel in Hominoids. *Am J Phys*  
270 *Anthropol* 86:295–309.
- 271 20. Tafforeau P, Smith TM. (2008) Nondestructive imaging of hominoid dental microstructure  
272 using phase contrast X-ray synchrotron microtomography. *J Hum Evol* 54:272–278.
- 273 21. Marchiori DF, Packota GV, Boughner JC (2016) Third-molar mineralization as a function  
274 of available retromolar space. *Acta Odont Scan* 74:509–517.
- 275 22. Renvoisé E, Kavanagh, KD, Lazzari V, Häkkinen TJ, Rice R, Pantalacci S, Salazar-Ciudad

- 276 I, Jernvall J (2017) Mechanical constraint from growing jaw facilitates mammalian dental  
277 diversity. *Proc Nat Acad Sci, USA* 114:9403–9408.
- 278 23. Green DR, Oack G, Colman AS (2018) Determinants of blood water  $\delta^{18}\text{O}$  variation in a  
279 population of experimental sheep: Implications for paleoclimate reconstruction. *Chem Geol*  
280 485:32–43.
- 281 24. Smith TM, Austin C, Green DR Joannes-Boyau R, Bailey S, Dumitriu D Fallon S, Grün R,  
282 James HF, Moncel MH, Williams IS, Wood R, Arora M (2018) Wintertime stress, nursing,  
283 and lead exposure in Neanderthal children. *Sci Adv* 4:10:eaau9483.
- 284 25. Vuik C (1993) Some historical notes about the Stefan problem, *Nieuw Archief voor*  
285 *Wiskunde* 11:157–167.
- 286 26. Häkkinen T (2016) On Free Boundary Problems. MSc thesis, Aalto University (2016).
- 287 27. Schindelin J, Arganda-Carreras I, Frise E, Kaynig V, Longair M, Pietzsch T, Preibisch S,  
288 Rueden C, Saalfeld, S, Schmid B., Tinevez, JY, White DJ, Hartenstein V, Eliceiri K,  
289 Tomancak P, Cardona, A (2012) Fiji: an open-source platform for biological-image  
290 analysis. *Nat methods* 9:676–682.
- 291 28. Cignoni P, Rocchini C, Scopigno R (1998) Metro: measuring error on simplified surfaces  
292 *Comput Graph Forum* 17:167–174.
- 293

294

295

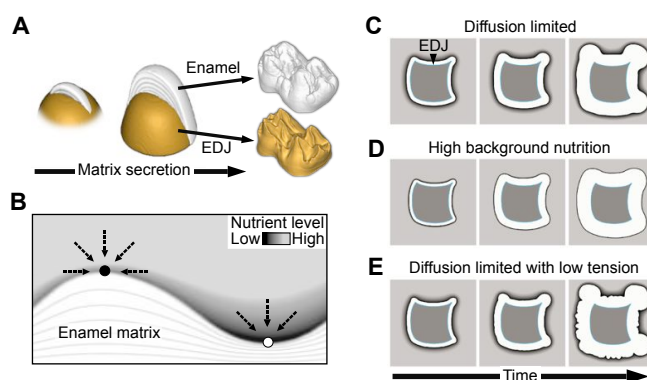

296

297 **Figure 1.** Modeling tooth enamel matrix secretion. (A) A schematic illustration of a cross  
298 section of enamel matrix being secreted on the top of dentine. In real teeth (a pig molar on the  
299 right), the enamel surface is not a linear representation of the dentine template (EDJ). (B) In a  
300 diffusion-limited model, differences in surface topography lead to ridges (black circle) receiving  
301 more nutrition (dashed arrows) than valleys (white circle). (C) Starting from a synthetic EDJ  
302 shape, diffusion-limited matrix deposition advances faster in convex than concave features. (D)  
303 Excess production of nutrition overcomes diffusion-limited effects and produces a uniform  
304 distribution of matrix. (E) Reducing surface tension of simulation in c results in crenulated  
305 matrix surface. For details of the model, see Methods, and parameters used in simulation are in  
306 Table S1.

307

308

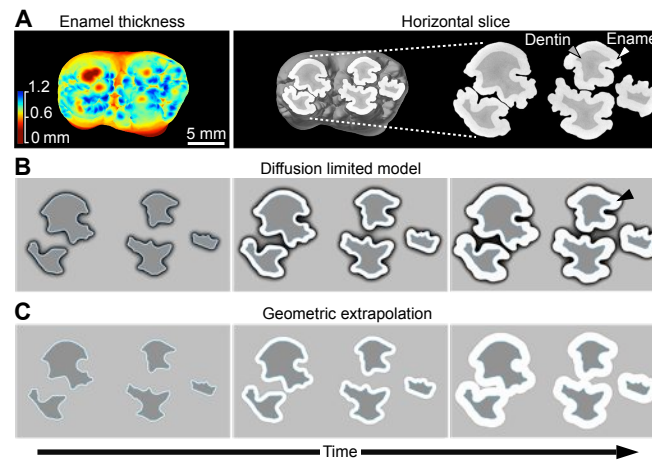

309

310 **Figure 2.** Diffusion-limited simulations approximate complex patterns of enamel thickness in  
311 the pig molar. (A) A heat map and a horizontal section of 3D tomography reconstruction of a  
312 pig molar shows the variable enamel thickness. (B) Using a horizontal EDJ section of a pig  
313 molar as an empirical template (A), diffusion-limited simulations of matrix secretion produce  
314 deep fissures present in concave surfaces. (C) Geometric extrapolation shows how the fissures  
315 are filled-in. In contrast, convex slopes are relatively similar between the simulations (B, C). All  
316 images show or are based on occlusal views of the left lower first molar. Simulations run until  
317 the lateral matrix thicknesses approximate the empirical enamel thicknesses, see Methods, and  
318 for parameters Table S1. Scale bar, 5 mm.

319

320

321

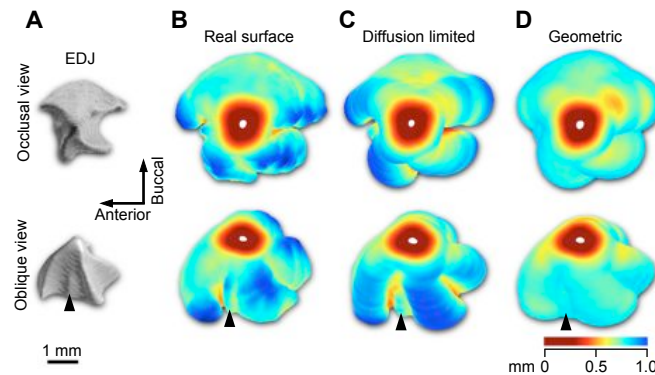

322

323 **Figure 3.** 3D distribution of enamel is predicted by the diffusion-limited model. (A) The EDJ of  
324 the pig entoconid cusp (arrowhead in Fig. 2B) has four ridges and only the buccal slope is  
325 convex whereas the other slopes are concave. (B) The enamel surface is thickest around the  
326 ridges and the EDJ concavities correspond to deep fissures with thinner enamel. The cusp tip  
327 with no EDJ has been removed from the 3D data. (C) The diffusion-limited matrix simulation,  
328 matched to have the enamel thickness of the convex lateral slope, captures the enamel  
329 distribution patterns of the pig cusp. The small ridge present in the mesial slope of the cusp  
330 (arrowhead in the oblique views) corresponds to a narrow ridge of matrix in the fissure both in  
331 the diffusion-limited simulation and the empirical enamel surface. (D) Geometric extrapolation  
332 from the EDJ results in relatively uniform 3D matrix thickness. The diffusion-limited  
333 simulations were done from 51 individual EDJ slices using the same parameter values (Table  
334 S1), and the geometric extrapolations from every slice. Enamel thickness measurements were  
335 done in 3D. The thinner enamel in the lower parts of the lingual cusp ridge of the real cusp  
336 (towards the bottom in occlusal view) is due to the vicinity of the adjacent hypoconid cusp, see  
337 Fig 2A,B. Scale bar, 1 mm.

338

339

340

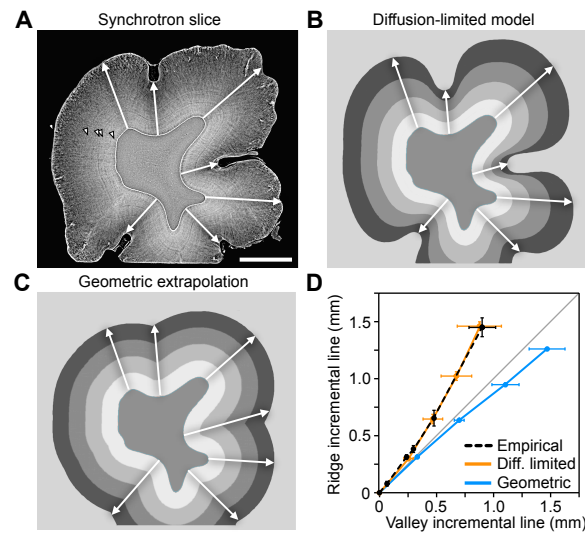

341

342 **Figure 4.** Incremental lines in pig molar tooth show comparable patterns to diffusion-limited  
343 matrix lines. (A) Incremental lines (arrowheads) are visible in a synchrotron imaged fully  
344 formed but unerupted cusp of the second lower molar. (B) Diffusion-limited simulation and (C)  
345 geometric extrapolation of matrix show contrasting patterns. The different shades of grey  
346 correspond to progressive steps in simulations (every fourth) and geometric extrapolation. (D)  
347 The arrows (in A,B,C) show the lines that are used to measure the progression of matrix  
348 secretion in the valleys (concave EDJ regions) and ridges (convex EDJ regions). Both the  
349 empirical and diffusion-limited simulations produce progressively thicker matrix in the ridges  
350 relative to the valleys (mean lines shown, error bars denote s.d.). The diffusion-limited  
351 simulation uses the same parameter values as the cusp in Fig 3. The border size (0.79) was set to  
352 produce the empirical enamel thickness using the same number of iterations as in Fig. 3. The  
353 target enamel thickness for the simulations was measured from the left side of the cusp. Because  
354 the cusp was physically trimmed for synchrotron imaging, the section is missing the lower side.  
355 Scale bar, 10 mm.



356

357

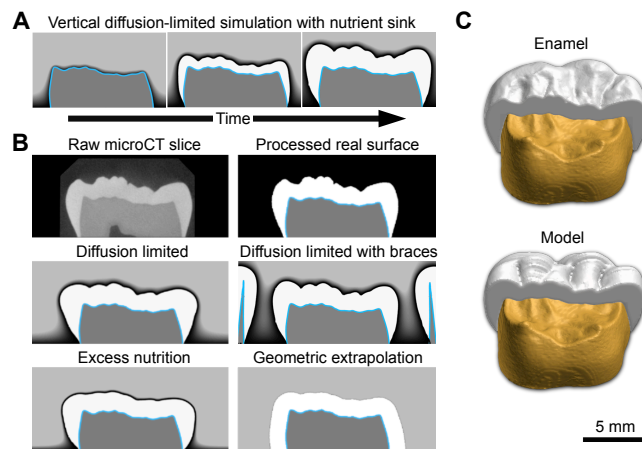

358

359 **Figure 5.** The subtle EDJ topography of human molars is sufficient to produce enamel surface  
360 features in diffusion-limited simulations. (A) To simulate the thick enamel of human molars that  
361 also have a low cusp relief, we combined vertically oriented simulations with a basal nutritional  
362 sink. The sink is used to simulate the shorter time of matrix secretion in the lower parts of the  
363 crown. (B) Diffusion-limited simulations reproduce the surface features that are lost in excess  
364 nutrition simulations and geometric extrapolations. Braces mimicking adjacent teeth and bone  
365 constrain lateral expansion of enamel matrix. (C) Obliquely lingual views of empirical and  
366 simulated enamel surfaces with a half of the EDJ (yellow) visible. The diffusion-limited  
367 simulations were done from 27 individual EDJ slices using the same parameter values (Table  
368 S1). The tooth shown is a human third lower molar. Scale bar, 5 mm.

369
